# Supplementary material for: Ferroelectric ZrO2 phases from infrared spectroscopy
Source: Royal Society of Chemistry journal article supplement (doi:10.1039/d3tc01985c), 2023-01-01
Supplement: d3tc01985c1.pdf [file d3tc01985c1.pdf]

## Supplementary information

### Ferroelectric ZrO<sub>2</sub> phases from Infrared spectroscopy

Ali El Boutaybi<sup>a</sup>, Rebecca, Cervasio<sup>b</sup>, Alban Degezelle<sup>a</sup>, Thomas Maroutian<sup>a</sup>,  
Jean-Blaise Brubach<sup>b</sup>, Valérie Demange<sup>c</sup>, Ludovic Largeau<sup>a</sup>, Marine Verseils<sup>b</sup>, Sylvia  
Matzen<sup>a</sup>, Guillaume Agnus<sup>a</sup>, Laurent Vivien<sup>a</sup>, Panagiotis Karamanis<sup>d</sup>, Michel Rérat<sup>d</sup>,  
Pascale Roy<sup>b</sup>, and Philippe Lecoœur<sup>a</sup>

<sup>a</sup>Centre de Nanosciences et de Nanotechnologies (C2N), Université Paris-Saclay, CNRS,  
91120 Palaiseau, France

<sup>b</sup>Synchrotron SOLEIL - CNRS - CEA Paris-Saclay, 91120 Palaiseau, France

<sup>c</sup>ISCR Univ Rennes, CNRS, ISCR—UMR 6226, ScanMAT—UMS 2001, Rennes, France

<sup>d</sup>Université de Pau et des Pays de l'Adour, CNRS, IPREM, E2S UPPA, Pau, France

[ali.el-boutaybi@c2n.upsaclay.fr](mailto:ali.el-boutaybi@c2n.upsaclay.fr)

## 1 IR active modes

As mentioned in the main paper, first-principles calculations suggest the stability of other polar phases, including the Pc and Pmn2<sub>1</sub> phases. Although these phases have not been observed experimentally yet, the Pc phase was found to have low bulk energy, similar to the Pbc2<sub>1</sub> phase in HfO<sub>2</sub> and ZrO<sub>2</sub> [1], while the Pmn2<sub>1</sub> phase was found to have lower energy than the t phase in HfO<sub>2</sub> [1, 2], and higher energy in ZrO<sub>2</sub> [1]. These two polar phases are also considered here. To investigate their IR activities and absorbance, unit cells of 6 and 24 atoms were used for Pmn2<sub>1</sub> and Pc, respectively [1, 3]. The simulated IR absorbance and peak positions are presented in Figure S1.d for the Pmn2<sub>1</sub> phase, displaying six bands located at 148, 244, 326, 468, 605, and 712  $cm^{-1}$ , with three bands showing close response to the t phase, mainly the ones at 148, 326, and 468  $cm^{-1}$ . However, the gap between the bands at 326  $cm^{-1}$  and 468  $cm^{-1}$  is higher for the Pmn2<sub>1</sub> phase compared to the t phase (around 142  $cm^{-1}$  Vs. 93  $cm^{-1}$ ), and also the intensity ratio between the lower bands (148 and 326  $cm^{-1}$ ) differs in the two phases (see Figures S1.d and 1.b in main paper).

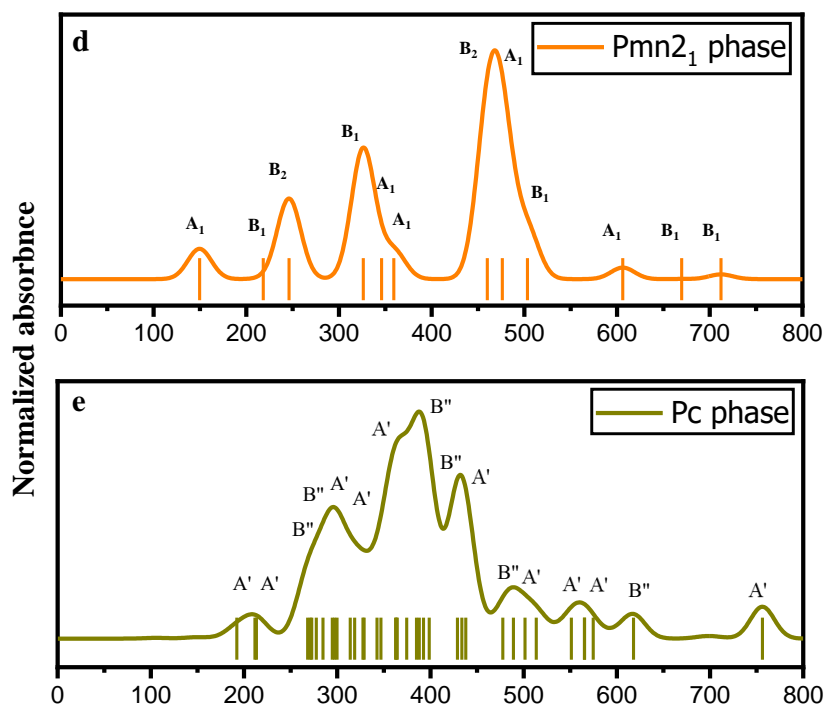

Figure S1: Infrared absorbance responses of ZrO<sub>2</sub> for the polar Pmn2<sub>1</sub> and Pc phases. All IR active modes are highlighted in bar form, with emphasis on the modes contributing most to IR absorbance. Only the high-intensity modes in IR are shown for the polar Pc phase since this phase was computed with a 24-atom unit cell and has a high number of IR modes (69 modes, see Tables S1 and S2 below).

Furthermore, the Pc phase with 24 atoms in the unit cell gives 72 phonon modes, and the 69 optical phonon modes are all active in IR. Even though this phase has a high number of IR active modes, only a few are intense and contribute to the IR absorbance as shown in Figure S1.e. The IR absorbance spectrum in the range between 300-500  $cm^{-1}$  is close to the one of the Pbc2<sub>1</sub> phase (see the main paper), with the main intense peak located at around 400  $cm^{-1}$  for both phases (390  $cm^{-1}$  for Pc phase Vs. 400  $cm^{-1}$  for Pbc2<sub>1</sub> phase). The distinctive IR band for Pc phase results from four phonon modes (B'' at 285  $cm^{-1}$ , B'' at 295  $cm^{-1}$ , A' at 297  $cm^{-1}$ , and A' at 299  $cm^{-1}$ ) and is located at around 295  $cm^{-1}$ . Also, the response at around 488  $cm^{-1}$ , which is a result of the modes A' at 478  $cm^{-1}$ , B'' at 489  $cm^{-1}$ , and B'' at 502  $cm^{-1}$ , is only intense in Pc phase compared to other polar phases even though a similar band is also present in the non-polar m phase (see the main paper and tables S1 and S2). However, m phase can be distinguished by XRD analysis.

In the following pages, Tables S1 and S2 display all IR active modes for the 6 investigated phases: Polar Pbc2<sub>1</sub>, R3m, Pmn2<sub>1</sub>, and Pc phases, and non-polar t and m phases. The evaluated IR intensities are also shown.

Table S1: IR-active modes for the t, Pbc2<sub>1</sub>, and R3m phases of ZrO<sub>2</sub>, with their corresponding intensities (in km/mol) evaluated using the CRYSTAL code and B3LYP functional.

| t-ZrO <sub>2</sub> |           |      | Pbc2 <sub>1</sub> -ZrO <sub>2</sub> |           |      | R3m-ZrO <sub>2</sub> |           |      |
|--------------------|-----------|------|-------------------------------------|-----------|------|----------------------|-----------|------|
| mode               | $cm^{-1}$ | I    | mode                                | $cm^{-1}$ | I    | mode                 | $cm^{-1}$ | I    |
| E <sub>u</sub>     | 138       | 1921 | A <sub>1</sub>                      | 102       | 333  | E                    | 76        | 0.10 |
| A <sub>2u</sub>    | 333       | 2128 | B <sub>2</sub>                      | 165       | 3.00 | E                    | 167       | 3.04 |
| E <sub>u</sub>     | 426       | 3562 | A <sub>1</sub>                      | 186       | 163  | A <sub>1</sub>       | 170       | 1.44 |
|                    |           |      | B <sub>1</sub>                      | 187       | 549  | E                    | 174       | 0.10 |
|                    |           |      | B <sub>1</sub>                      | 224       | 1202 | A <sub>1</sub>       | 221       | 1785 |
|                    |           |      | B <sub>2</sub>                      | 233       | 956  | E                    | 233       | 3346 |
|                    |           |      | B <sub>2</sub>                      | 289       | 51   | A <sub>1</sub>       | 268       | 0.48 |
|                    |           |      | A <sub>1</sub>                      | 291       | 80   | E                    | 324       | 31   |
|                    |           |      | B <sub>1</sub>                      | 298       | 60   | A <sub>1</sub>       | 353       | 1715 |
|                    |           |      | A <sub>1</sub>                      | 316       | 1927 | E                    | 358       | 3423 |
|                    |           |      | B <sub>1</sub>                      | 329       | 512  | A <sub>1</sub>       | 450       | 1559 |
|                    |           |      | B <sub>2</sub>                      | 345       | 2041 | E                    | 457       | 3606 |
|                    |           |      | A <sub>1</sub>                      | 351       | 57   | A <sub>1</sub>       | 533       | 87   |
|                    |           |      | B <sub>1</sub>                      | 387       | 442  | E                    | 536       | 262  |
|                    |           |      | B <sub>2</sub>                      | 399       | 1356 | E                    | 587       | 1.12 |
|                    |           |      | B <sub>1</sub>                      | 402       | 2929 | A <sub>1</sub>       | 674       | 35   |
|                    |           |      | A <sub>1</sub>                      | 445       | 1924 | E                    | 683       | 88   |
|                    |           |      | B <sub>2</sub>                      | 460       | 284  | E                    | 720       | 0.30 |
|                    |           |      | B <sub>1</sub>                      | 514       | 396  | A <sub>1</sub>       | 755       | 1.21 |
|                    |           |      | B <sub>1</sub>                      | 545       | 18   |                      |           |      |
|                    |           |      | A <sub>1</sub>                      | 566       | 96   |                      |           |      |
|                    |           |      | B <sub>2</sub>                      | 621       | 92   |                      |           |      |
|                    |           |      | B <sub>2</sub>                      | 683       | 22   |                      |           |      |
|                    |           |      | B <sub>1</sub>                      | 726       | 353  |                      |           |      |

Table S2: IR-active modes for the Pmn2<sub>1</sub>, m(P2<sub>1</sub>/c), and Pc phases of ZrO<sub>2</sub>, with their corresponding intensities (in km/mol) evaluated using the CRYSTAL code and B3LYP functional.

| Pmn2 <sub>1</sub> -ZrO <sub>2</sub> |                |      | m(P2 <sub>1</sub> /c)-ZrO <sub>2</sub> |                |      | Pc-ZrO <sub>2</sub>     |      |       |
|-------------------------------------|----------------|------|----------------------------------------|----------------|------|-------------------------|------|-------|
| <i>cm</i> <sup>-1</sup>             | mode           | I    | <i>cm</i> <sup>-1</sup>                | mode           | I    | <i>cm</i> <sup>-1</sup> | mode | I     |
| 149                                 | A <sub>1</sub> | 365  | 199                                    | A <sub>u</sub> | 19   | 106                     | A'   | 20.19 |
| 218                                 | B <sub>2</sub> | 6.28 | 243                                    | B <sub>u</sub> | 671  | 138                     | B''  | 0.02  |
| 246                                 | B <sub>1</sub> | 972  | 255                                    | A <sub>u</sub> | 120  | 148                     | A'   | 26.61 |
| 326                                 | B <sub>2</sub> | 1575 | 277                                    | A <sub>u</sub> | 842  | 153                     | A'   | 13.17 |
| 345                                 | A <sub>1</sub> | 6.05 | 323                                    | B <sub>u</sub> | 660  | 158                     | B''  | 0.03  |
| 359                                 | A <sub>1</sub> | 336  | 335                                    | B <sub>u</sub> | 2754 | 186                     | B''  | 4.16  |
| 460                                 | B <sub>1</sub> | 1712 | 370                                    | A <sub>u</sub> | 1072 | 192                     | A'   | 288   |
| 476                                 | A <sub>1</sub> | 1650 | 371                                    | B <sub>u</sub> | 2126 | 197                     | B''  | 9.76  |
| 503                                 | B <sub>2</sub> | 573  | 425                                    | A <sub>u</sub> | 2025 | 199                     | B''  | 9.32  |
| 606                                 | A <sub>1</sub> | 139  | 438                                    | B <sub>u</sub> | 1425 | 205                     | B''  | 1.38  |
| 669                                 | B <sub>2</sub> | 2.49 | 503                                    | A <sub>u</sub> | 906  | 212                     | A'   | 220   |
| 712                                 | B <sub>2</sub> | 57   | 533                                    | B <sub>u</sub> | 1195 | 213                     | A'   | 345   |
|                                     |                |      | 601                                    | A <sub>u</sub> | 668  | 227                     | B''  | 0.26  |
|                                     |                |      | 675                                    | A <sub>u</sub> | 12   | 236                     | A'   | 2.67  |
|                                     |                |      | 752                                    | B <sub>u</sub> | 616  | 268                     | A    | 1183  |
|                                     |                |      |                                        |                |      | 271                     | B''  | 430   |
|                                     |                |      |                                        |                |      | 272                     | A'   | 107   |
|                                     |                |      |                                        |                |      | 277                     | A'   | 40.07 |
|                                     |                |      |                                        |                |      | 284                     | B''  | 514   |
|                                     |                |      |                                        |                |      | 294                     | B''  | 1242  |
|                                     |                |      |                                        |                |      | 297                     | A'   | 1098  |
|                                     |                |      |                                        |                |      | 299                     | A'   | 454   |
|                                     |                |      |                                        |                |      | 314                     | B''  | 292   |
|                                     |                |      |                                        |                |      | 318                     | A'   | 1050  |
|                                     |                |      |                                        |                |      | 327                     | B''  | 34.47 |
|                                     |                |      |                                        |                |      | 327                     | A'   | 332   |
|                                     |                |      |                                        |                |      | 328                     | A'   | 446   |
|                                     |                |      |                                        |                |      | 342                     | B''  | 321   |
|                                     |                |      |                                        |                |      | 346                     | A'   | 917   |
|                                     |                |      |                                        |                |      | 362                     | A'   | 1850  |
|                                     |                |      |                                        |                |      | 363                     | B''  | 151   |
|                                     |                |      |                                        |                |      | 364                     | A'   | 2252  |
|                                     |                |      |                                        |                |      | 374                     | B''  | 180   |
|                                     |                |      |                                        |                |      | 383                     | A'   | 19.18 |
|                                     |                |      |                                        |                |      | 384                     | B''  | 355   |
|                                     |                |      |                                        |                |      | 388                     | A'   | 2020  |
|                                     |                |      |                                        |                |      | 392                     | B''  | 2697  |

|     |     |        |
|-----|-----|--------|
| 398 | A'  | 855    |
| 408 | A'  | 31.93  |
| 411 | B'' | 29.07  |
| 428 | B'' | 1687   |
| 433 | A'  | 2306   |
| 438 | B'' | 626    |
| 455 | A'  | 79.90  |
| 477 | A'  | 499.   |
| 488 | B'' | 877    |
| 501 | B'' | 189    |
| 505 | B'' | 0.33   |
| 513 | A'  | 649    |
| 538 | B'' | 38.52  |
| 551 | A'  | 529    |
| 565 | A'  | 431    |
| 565 | B'' | 116    |
| 575 | A'  | 154    |
| 581 | B'' | 2.68   |
| 596 | A'  | 56.87  |
| 604 | B'' | 49.56  |
| 606 | B'' | 2.18   |
| 618 | B'' | 647    |
| 646 | A'  | 1.71   |
| 657 | B'' | 0.07 A |
| 697 | B'' | 56.95  |
| 700 | A'  | 3.75   |
| 706 | B'' | 14.90  |
| 719 | B'' | 1.21   |
| 756 | A'  | 889    |
| 785 | B'' | 0.20   |

---

---

## 2 R3m phase and intermediate P1 phase

Figure S2.a depicts the infrared absorbance response of the R3m phase stabilized under pressure (using the experimental volume), as discussed in the main paper, while the R3m symmetry was maintained, and compares it to the one for the (unstable) R3m phase at the optimized volume. Both IR responses are quite similar, with a shift to lower energy for the peaks of the R3m phase at the optimized volume. This similarity arises because the unstable modes correspond to the first optical modes (E), which do not significantly contribute to the IR absorbance of the R3m  $\text{ZrO}_2$  phase.

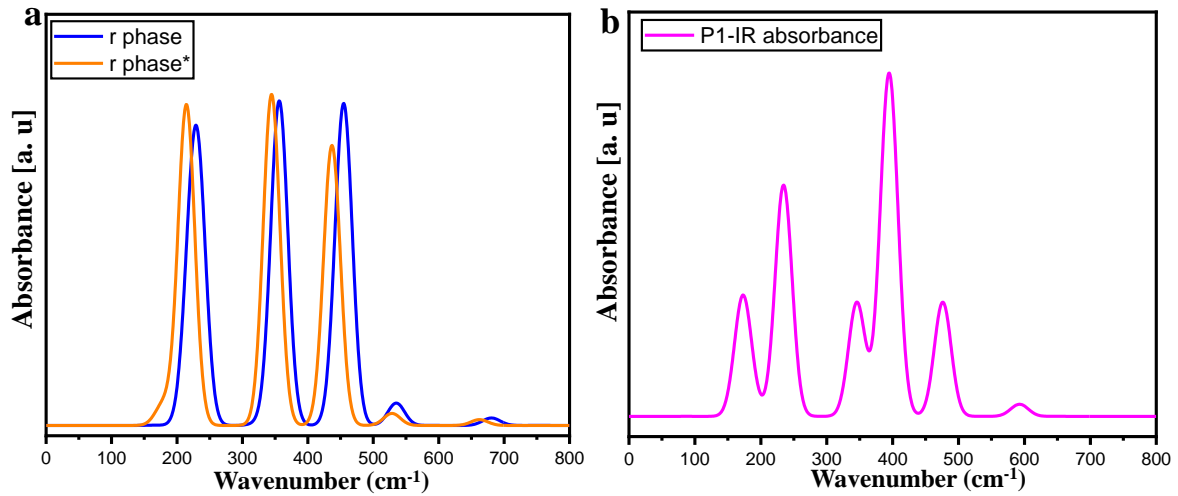

Figure S2: (a) IR absorbance response of  $\text{ZrO}_2$  R3m phase (blue). The IR absorbance computed at optimized volume (r phase\*, orange) for the R3m phase is also shown for comparison. (b) IR absorbance of the intermediate phase P1 discussed in the main paper.

The IR absorbance of the intermediate phase identified in the main paper with the triclinic space group P1 was also calculated and is presented in Figure S2.b. It is evident that this intermediate phase exhibits a much richer set of IR bands, as is expected for the triclinic crystal system. Note that this intermediate phase is unstable; hence, a constant pressure was applied in order to obtain only positive phonons and calculate the IR absorbance.

Table S3 presents the lattice parameters of the P1 intermediate phase discussed in the main paper. It should be noted that this phase is unstable, characterized by the presence of the unstable B'' phonon mode.

Table S3: Atomic positions and lattice parameters of the intermediate P1 phase.

|     | a(Å)                | b(Å)                | c(Å)                |
|-----|---------------------|---------------------|---------------------|
|     | 5.15812746          | 5.15812746          | 5.13569359          |
|     | x/a                 | y/b                 | z/c                 |
| Zr1 | 8.427491865210E-02  | -4.157444327672E-01 | 8.422283571494E-02  |
| Zr2 | 8.430258783145E-02  | 8.430258783132E-02  | -4.157410223418E-01 |
| Zr3 | -4.157444327669E-01 | 8.427491865178E-02  | 8.422283571493E-02  |
| Zr4 | -4.156909592185E-01 | -4.156909592195E-01 | -4.158471357902E-01 |
| O1  | 3.101728904277E-01  | -1.416928197962E-01 | 3.310715204873E-01  |
| O2  | 3.100846754547E-01  | 3.100846754551E-01  | -1.624213398556E-01 |
| O3  | -1.416928197965E-01 | 3.101728904279E-01  | 3.310715204873E-01  |
| O4  | -1.899479774715E-01 | 3.584818991351E-01  | -1.622246433052E-01 |
| O5  | -1.898684734175E-01 | -1.898684734176E-01 | 3.308084446862E-01  |
| O6  | 3.584818991349E-01  | -1.899479774714E-01 | -1.622246433052E-01 |
| O7  | -1.415695536503E-01 | -1.415695536506E-01 | -1.625545369866E-01 |
| O8  | 3.583247203773E-01  | 3.583247203781E-01  | 3.309612133794E-01  |



### 3 Strain effect on IR absorbance spectra of t and R3m phases

Figure S3 depicts the IR absorbance spectra of symmetrized and non-symmetrized  $\text{ZrO}_2$  t phase. Removing the symmetry activates additional IR bands; however, the intensities of these new IR bands are almost zero, as depicted in Figure S3.b.

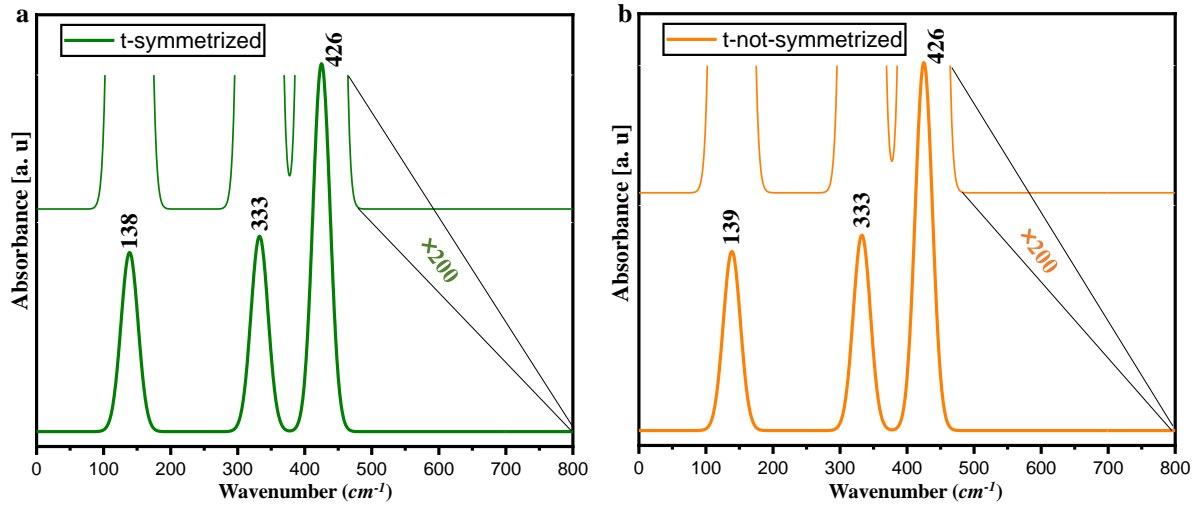

Figure S3: Infrared absorbance responses of  $\text{ZrO}_2$  t phase in two cases: (a) with preserved symmetry and (b) with symmetry removed.

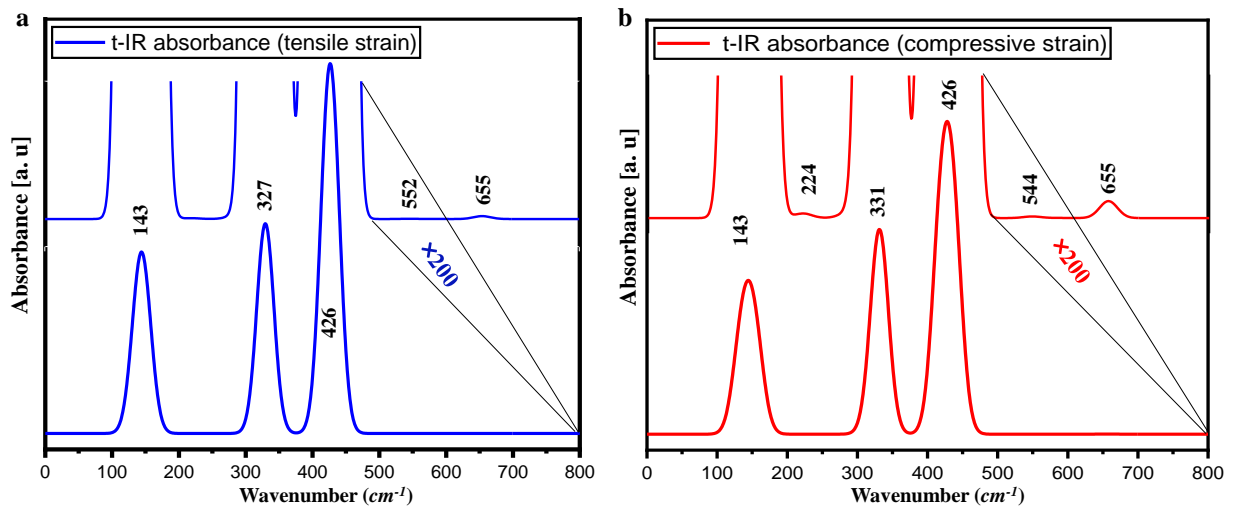

Figure S4: Infrared absorbance responses of  $\text{ZrO}_2$  t phase with symmetry removed and submitted to (a) 1% tensile strain and (b) 1% compressive strain.

Now, when applying additional strain (compressive or tensile), the activated IR bands in the non-symmetrized t phase become more pronounced, although the change is relatively small. A zoomed-in portion is shown in Figure S4, where it is evident that these newly activated bands are amplified. Note that the zoomed-in parts shown in Figures S3 and S4 have the same intensity scale for comparison. The tensile strain of 1% (Figure S4.a) caused a shift of the lowest band from around  $138\text{ cm}^{-1}$  to  $143\text{ cm}^{-1}$ , and the additional IR bands are located at  $552\text{ cm}^{-1}$  and  $655\text{ cm}^{-1}$ .

Regarding the compressive strain of 1% (Figure S4.b), a similar effect as for tensile strain is observed, particularly for the lowest energy IR band. However, the compressive strain appears to amplify the additional IR bands to a greater intensity compared to tensile strain, as shown in Figure S4. Note that compressive and tensile strains are applied to the unit cell of  $\text{ZrO}_2$ , considering the (111)-oriented thin films. As a result, in the case of a pseudo-cubic system, the unit cell angle will be distorted. Under compressive strain, the unit cell angle will be below  $90^\circ$ , while under tensile strain, it will be above  $90^\circ$ .

In the case of the r phase, which is obtained when compressive strain is applied, the IR absorbance is computed at two different strain values. The first is the strain reported experimentally in  $\text{ZrO}_2$  with a rhombohedral angle of  $89.56^\circ$  and discussed in the main paper, and the second is the compressive strain applied with a rhombohedral angle of  $89^\circ$ . The IR absorbance responses are shown in Figure S5.

Under high compressive strain (Figure S5.b), the lowest IR absorbance band is more significantly affected. It becomes broader and decreases in intensity compared to the same band shown in Figure S5.a. The remaining IR bands, however, undergo minimal changes, with shifts of less than  $\pm 5\text{ cm}^{-1}$ .

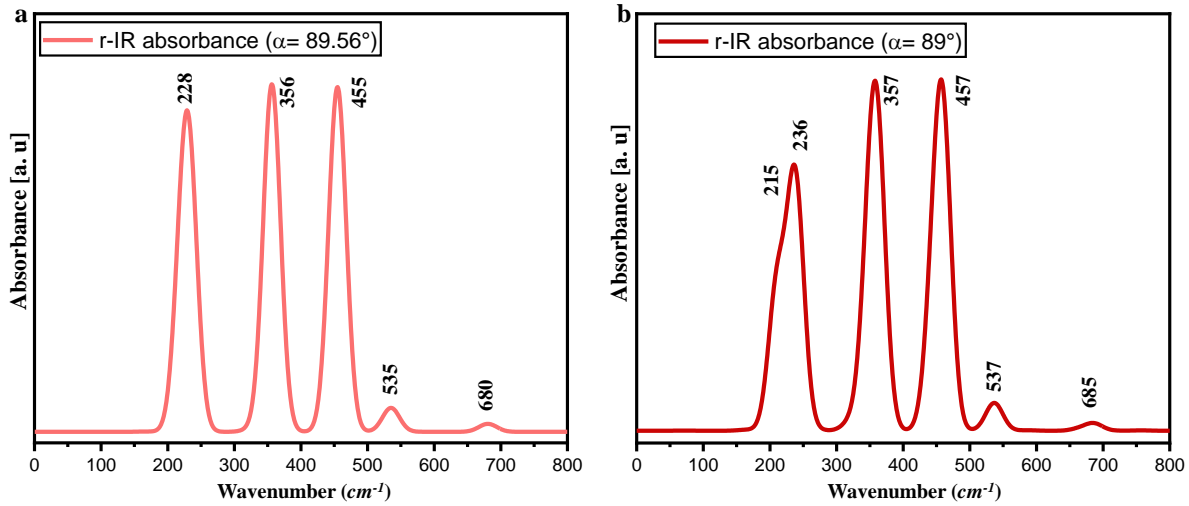

Figure S5: Infrared absorbance responses of the  $\text{ZrO}_2$  r phase under two different compressive strains.

## 4 Cm phase

The ZrO<sub>2</sub> Cm phase was identified by following the unstable phonon mode in the R3m phase. This phase belongs to the monoclinic structure with space group Cm (No.8). The atomic positions are provided in the table below. It is worth noting that this structure can be represented in two different forms, rhombohedral or monoclinic.

Table S4: Atomic positions and lattice parameters of Cm phase in monoclinic representation.

|        | a(Å)      | b(Å)      | c(Å)      |
|--------|-----------|-----------|-----------|
|        | 7.265995  | 7.265995  | 5.205750  |
|        | x/a       | y/b       | z/c       |
| Zr1    | -0.165833 | -0.250028 | 0.084284  |
| Zr2    | 0.084451  | 0.000000  | -0.415768 |
| Zr3    | -0.415589 | 0.000000  | -0.415768 |
| O1     | 0.084299  | -0.249866 | 0.293945  |
| O2     | 0.334004  | 0.000000  | -0.125603 |
| O3     | 0.084260  | 0.250112  | -0.206018 |
| O4     | -0.165802 | 0.000000  | 0.374661  |
| O5     | -0.165611 | 0.000000  | -0.125381 |
| O6     | 0.334374  | 0.000000  | 0.374428  |
| Angles | $\alpha$  | $\beta$   | $\gamma$  |
|        | 90        | 90.05     | 90        |

Figure S6 displays the IR absorbance of the Cm phase, which, at first glance, appears similar to that of the t phase (Figure S3.a). However, there is a noticeable shift in the band around  $333\text{ cm}^{-1}$  in the Cm phase. Moreover, small additional bands are observed at around  $215\text{ cm}^{-1}$  and  $279\text{ cm}^{-1}$ . These observations suggest that the Cm phase IR absorbance response should exhibit similar behavior with strain as the t phase, discussed in the previous section (Figure S4).

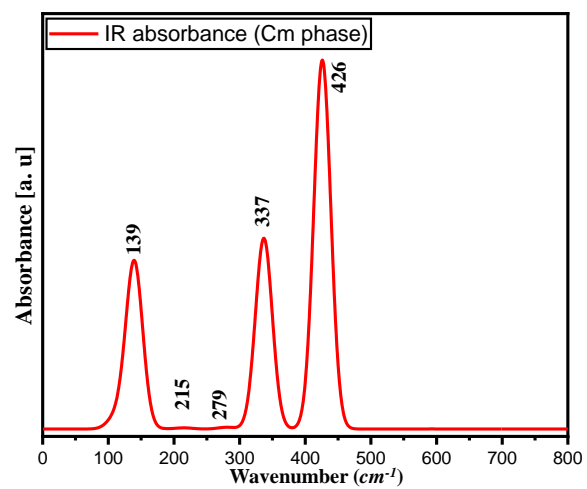

Figure S6: Infrared absorbance response of the ZrO<sub>2</sub> Cm phase.

## References

- <sup>1</sup>L. Azevedo Antunes, R. Ganser, C. Kuenneth, and A. Kersch, “Characteristics of low-energy phases of hafnia and zirconia from density functional theory calculations”, [physica status solidi \(RRL\) – Rapid Research Letters](#) **16**, 2100636 (2022).
- <sup>2</sup>Y. Qi, S. Singh, C. Lau, F.-T. Huang, X. Xu, F. J. Walker, C. H. Ahn, S.-W. Cheong, and K. M. Rabe, “Stabilization of competing ferroelectric phases of HfO<sub>2</sub> under epitaxial strain”, [Phys. Rev. Lett.](#) **125**, 257603 (2020).
- <sup>3</sup>T. D. Huan, V. Sharma, G. A. Rossetti, and R. Ramprasad, “Pathways towards ferroelectricity in hafnia”, [Phys. Rev. B](#) **90**, 064111 (2014).
